# THE AMERICAN JOURNAL OF PSYCHIATRY

---

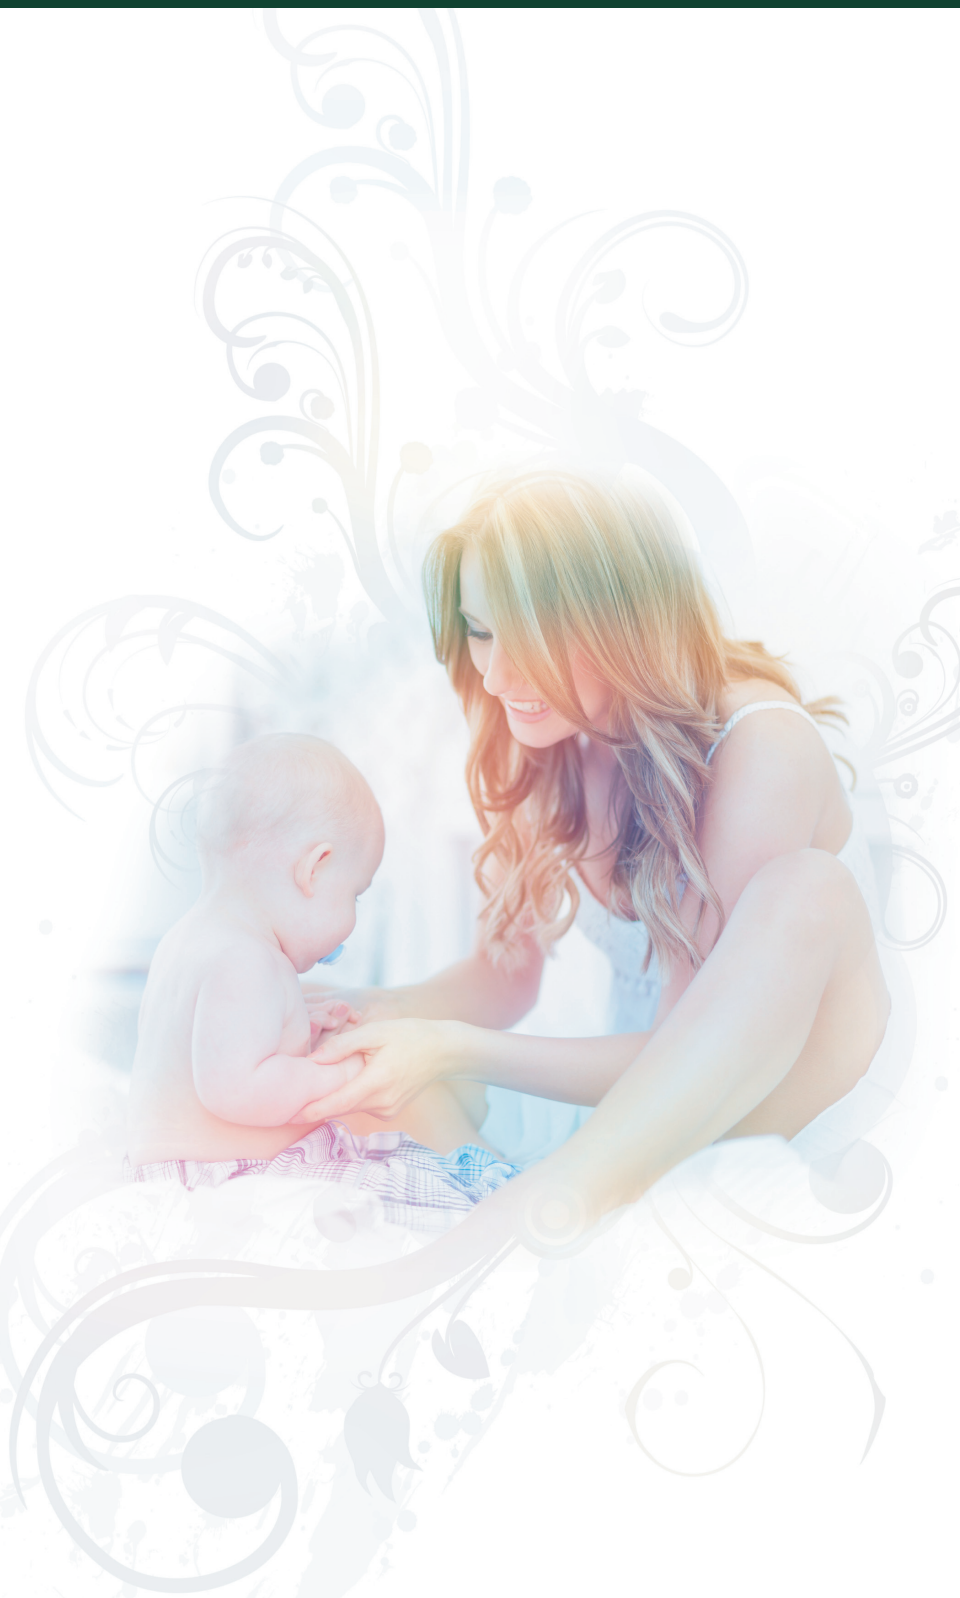

Differences in White Matter Fiber Tract Development Present From 6 to 24 Months in Infants With Autism

Jason J. Wolff, Ph.D., et al.

589

Prevention of Postpartum Psychosis and Mania in Women at High Risk

Veerle Bergink, M.D., et al.

609

Antidepressants May Mitigate the Effects of Prenatal Maternal Anxiety on Infant Auditory Sensory Gating

Sharon K. Hunter, Ph.D., et al.

616

Maternal Antibodies to Dietary Antigens and Risk for Nonaffective Psychosis in Offspring

Håkan Karlsson, Ph.D., et al.

625

Continuing Medical Education

671

**June 2012**

**Volume 169 • Number 6**

---

Official Journal of the  
AMERICAN PSYCHIATRIC ASSOCIATION

---

[ajp.psychiatryonline.org](http://ajp.psychiatryonline.org)
