# THE AMERICAN JOURNAL OF PSYCHIATRY

## EDITOR-IN-CHIEF

Robert Freedman, M.D.

## DEPUTY EDITORS

David A. Lewis, M.D.

Robert Michels, M.D.

Daniel S. Pine, M.D.

Susan K. Schultz, M.D.

Carol A. Tamminga, M.D.

## EDITORIAL STAFF

**Executive Editor**  
Michael D. Roy

**Senior Editor/Features Writer**  
Jane Weaver, E.L.S.

**Senior Editor**  
John J. Guardiano, Ph.D.

**Production Manager**  
Susan Westrate

**Assistant Editors**  
Katie Duffy  
Angela Moore

**Editorial Support Services  
Manager**  
Nicole Gray

**Editorial Assistant**  
Linda LaCour

**Editorial Assistant/  
Permissions Coordinator**  
Heidi Koch

**Assistants to the Editors**  
Lois Lilienthal  
Laura English  
Rachel Hogg  
Russell A. Scholl

## ASSOCIATE EDITORS

Kathleen T. Brady, M.D., Ph.D.

David A. Brent, M.D.

Linda Brzustowicz, M.D.

Cameron S. Carter, M.D.

Steven Hamilton, M.D., Ph.D.

Daniel C. Javitt, M.D.

Bankole Johnson, M.D.

Ellen Leibenluft, M.D.

Douglas F. Levinson, M.D.

Jeffrey A. Lieberman, M.D.

Barbara Milrod, M.D.

Maria A. Oquendo, M.D.

Jerrold F. Rosenbaum, M.D.

A. John Rush, M.D.

Larry J. Siever, M.D.

Patricia Suppes, M.D., Ph.D.

## EDITOR EMERITA

Nancy C. Andreasen, M.D., Ph.D.

## FORMER EDITORS

Amariah Brigham, M.D.  
1844-1849

T. Romeyn Beck, M.D.  
1849-1854

John P. Gray, M.D.  
1854-1886

G. Alder Blumer, M.D.  
1886-1894

Richard Dewey, M.D.  
1894-1897

Henry M. Hurd, M.D.  
1897-1904

Edward N. Brush, M.D.  
1904-1931

Clarence B. Farrar, M.D.  
1931-1965

Francis J. Braceland, M.D.  
1965-1978

John C. Nemiah, M.D.  
1978-1993

The American Journal of Psychiatry is online at [ajp.psychiatryonline.org](http://ajp.psychiatryonline.org)

# THE AMERICAN PSYCHIATRIC ASSOCIATION

1000 Wilson Blvd., Suite 1825, Arlington, VA 22209-3901  
(888) 357-7924 (toll-free inside the U.S. and Canada) / (703) 907-7300  
web site: [www.psych.org/](http://www.psych.org/) e-mail: [apa@psych.org](mailto:apa@psych.org)

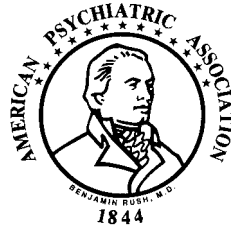

## OFFICERS 2011-2012

|                 |                      |
|-----------------|----------------------|
| President       | John M. Oldham, M.D. |
| President-Elect | Dilip V. Jeste, M.D. |
| Treasurer       | David Fassler, M.D.  |
| Secretary       | Roger Peele, M.D.    |

## ASSEMBLY

|               |                          |
|---------------|--------------------------|
| Speaker       | Ann Marie Sullivan, M.D. |
| Speaker-Elect | R. Scott Benson, M.D.    |
| Recorder      | Melinda Young, M.D.      |

## MEDICAL DIRECTOR'S OFFICE

|                          |                            |
|--------------------------|----------------------------|
| Medical Director and CEO | James H. Scully, Jr., M.D. |
|--------------------------|----------------------------|

## BOARD OF TRUSTEES

|                            |                                  |
|----------------------------|----------------------------------|
| Carol A. Bernstein, M.D.   | Alan F. Schatzberg, M.D.         |
| Brian Crowley, M.D.        | Joyce A. Spurgeon, M.D.          |
| Marc David Graff, M.D.     | Frederick J. Stoddard, Jr., M.D. |
| James A. Greene, M.D.      | Nada L. Stotland, M.D., M.P.H.   |
| Marilyn Griffin, M.D.      | John J. Wernert III, M.D.        |
| Sarah Johnson, M.D., M.Sc. | Alik S. Widge, M.D., Ph.D.       |
| James E. Nininger, M.D.    | William M. Womack, M.D.          |

## PUBLISHER

Rebecca D. Rinehart

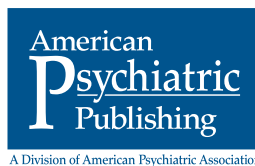

The American Journal of Psychiatry is online at [ajp.psychiatryonline.org](http://ajp.psychiatryonline.org)

THE AMERICAN PSYCHIATRIC ASSOCIATION  
Chairpersons of Councils, Commissions, Committees, and Task Forces

**Standing Committees**

---

**Bylaws**

John O. Gaston, M.D.

**Elections**

Robert E. Kelly, Jr., M.D.

**Ethics**

Richard D. Milone, M.D.

**Finance and Budget**

Frank W. Brown, M.D.

**Audit**

David Fassler, M.D.

**Investment Oversight**

Larry R. Faulkner, M.D.

**Joint Reference**

Dilip V. Jeste, M.D.

**Membership**

Joseph Ezra V. Rubin, M.D.

**Nominating**

Carol A. Bernstein, M.D.

**Tellers**

Eliot Sorel, M.D.

**Council on Addiction Psychiatry**

---

John A. Renner, M.D.

**Council on Advocacy and  
Government Relations**

---

Robert Paul Cabaj, M.D.

*Advocacy and Litigation Funding*

Jeffrey L. Metzner, M.D.

**Council on Children, Adolescents,  
and Their Families**

---

Steven Paul Cuffe, M.D.

*Agnes Purcell McGavin Award*

John E. Schowalter, M.D.

*Blanche F. Ittleson Research Award*

Beth Ann Brooks, M.D.

**Council on Communications**

---

Jeffrey A. Borenstein, M.D.

**Council on Healthcare Systems  
and Financing**

---

Anita Smith Everett, M.D.

*Reimbursement for Psychiatric Care*

Joseph T. English, M.D.

*RBRVS, Codes and Reimbursement*

Ronald M. Burd, M.D.

**Council on Medical Education and  
Lifelong Learning**

---

Sandra Sexson, M.D.

*APA Public Psychiatry Fellowship Selection  
Committee*

Jules M. Ranz, M.D.

*APA/SAMHSA Minority Fellowship Selection and  
Advisory*

Maria A. Oquendo, M.D.

*Scientific Program*

Kenneth R. Silk, M.D.

*Scientific Program Committee of the Institute  
on Psychiatric Services*

David Alan Pollack, M.D.

*Task Force to Update the Ethics Annotations*

Laura W. Roberts, M.D.

*Vestermark Award Committee*

Kailie R. Shaw, M.D.

**Council on Minority Health and  
Health Disparities**

---

Sandra C. Walker, M.D.

**Council on Psychiatry And Law**

---

Patricia R. Recupero, M.D., J.D.

*Isaac Ray Award*

Renee L. Binder, M.D.

*Judicial Action*

Paul S. Appelbaum, M.D.

*Manfred S. Guttmacher Award*

Marilyn Price, M.D., C.M.

**Council on Psychosomatic  
Medicine and Geriatric Psychiatry**

---

Robert Paul Roca, M.D.

**Council on Research and Quality  
Care**

---

Jeffrey A. Lieberman, M.D.

*Electronic Health Records*

Steven Roy Daviss, M.D.

*Psychiatric Dimensions of Disasters*

Robert J. Ursano, M.D.

*Research Awards*

Stuart C. Yudofsky, M.D.

*Steering Committee on Practice Guidelines*

Joel Yager, M.D.

*Task Force on DSM-V*

David J. Kupfer, M.D.

*Task Force on Gender Identity Disorder*

William M. Byne, M.D.

APA Officers and Chairpersons for 2012–2013 took office at the conclusion of the APA Annual Meeting, after this issue went to press. The July issue of *The American Journal of Psychiatry* will feature these officeholders.

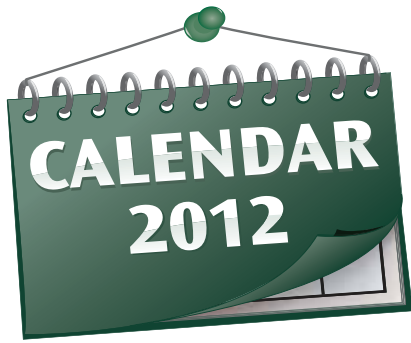

For free listing of your organization's official annual or regional meeting, please send us the following information: sponsor, location, inclusive dates, type and number of continuing education credits (if available), and the name, address, and telephone number of the person or group to contact for more information. In order for an event to appear in our listing, all notices and changes must be received at least 6 months in advance of the meeting and should be addressed to:

**Calendar, American Journal of Psychiatry, 1000 Wilson Boulevard, Suite 1825, Arlington, VA 22209-3901, [swestrade@psych.org](mailto:swestrade@psych.org) (e-mail).**

Because of space limitations, only listings of meetings of the greatest interest to Journal readers may be included.

---

## JUNE

**June 14–16**, 38th Annual Meeting, Association of Directors of Medical Student Education in Psychiatry, Blaine, Wash. Contact: Gary L. Beck, Ph.D., (402) 559-7351; [gbeck@unmc.edu](mailto:gbeck@unmc.edu) (email).

**June 23–27**, Joint Organizational Meeting of the Organization of Teratology Information Specialists, the Teratology Society, and the Neurobehavioral Teratology Society, Baltimore, Md. Contact Ms. Dee Quinn, University of Arizona, Drachman Hall, PO Box 210202, 1295 N. Martin, Room B308, Tucson, AZ 85721-0202; (520) 626-3547 (tel); [www.otispregnancy.org](http://www.otispregnancy.org); [www.teratology.org](http://www.teratology.org); [www.nbts.org](http://www.nbts.org).

---

## SEPTEMBER

**September 21–23**, 5th International Conference on Schizophrenia (ICONS V), Chennai, India. Organised by the Schizophrenia Research Foundation (India) in collaboration with Schizophrenia International Research Society. Co-sponsored by WPA, Indian Psychiatric Society. For details see [www.icons-scarf.org](http://www.icons-scarf.org).

**September 27–29**, 2nd International Congress on Borderline Personality Dis-

order and Allied Disorders, Amsterdam RAI Convention Center, The Netherlands. Contact Theo Ingenhoven, Scientificcommittee@esspd.eu (email); or [borderline2012@cpo-hanser.de](mailto:borderline2012@cpo-hanser.de) (email); <http://www.borderline-congress.org> (web site).

---

## OCTOBER

**October 3–5**, International Biennial Congress of the Marcé Society (International Society for the Understanding, Prevention and Treatment of Mental Illness Related to Childbearing), in collaboration with the Société Marcé Francophone, Paris, France (conducted in English). Contact: Ms. Nicole Greer, 5034-A Thoroughbred Lane, Brentwood, TN 37027 USA; (615) 324-2362 (tel); [info@marcesociety.com](mailto:info@marcesociety.com) (email); [www.marcesociety.com](http://www.marcesociety.com) (web site).

**October 3–7**, Joint Meeting of the Southern Psychiatric Association; Maryland Psychiatric Society; and West Virginia Psychiatric Society, White Sulphur Springs, West Virginia (The Greenbrier). Contact Susan Proctor, (410) 938-3403; [www.sopsych.org](http://www.sopsych.org) (web site).

**October 4–7**, 64th Institute on Psychiatric Services, American Psychiatric

Association, New York, NY. Contact: Jill Gruber, APA Annual Meetings Dept., 1000 Wilson Blvd., Ste. 1825, Arlington, VA 22209; (703) 907-7815.

---

## DECEMBER

**December 6–9**, 23rd Annual Meeting and Symposium, American Academy of Addiction Psychiatry, Turnberry Isle Hotel Miami, Aventura, Florida. Contact: Isabel Vieira, 400 Massasoit Ave, Suite 307 (2nd floor), East Providence, RI 02914; (401) 524-3076 (tel); [www.aaap.org/meetings-and-events](http://www.aaap.org/meetings-and-events) (web site).

---

## JUNE 2013

**June 6–9**, 4th World Congress on ADHD: From Childhood to Adult Disease, Milan, Italy. Contact Congress Organizer, +49-40-670 88 20 (tel); [adhd2013@cpo-hanser.de](mailto:adhd2013@cpo-hanser.de) (email); [www.adhd-congress.org](http://www.adhd-congress.org) (web site).

---

## JULY 2014

**July 8–13**, 28th International Congress of Applied Psychology, Palais des Congrès de Paris, France. Contact [exh@icap2014.com](mailto:exh@icap2014.com) (email); [www.icap2014.com](http://www.icap2014.com) (web site).

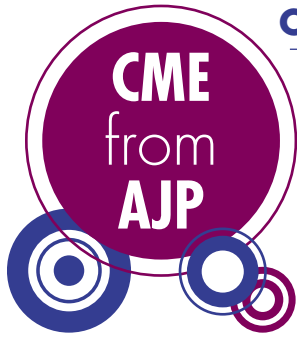

## Continuing Medical Education

Three articles in this issue form the basis of a short course with questions that can be answered for up to 1 *AMA PRA Category 1 Credit™* each by visiting <http://psychiatryonline.org/cme.aspx> and clicking on the “American Journal of Psychiatry” tab.

CME credit is issued only online, and a paid subscription to the AJP CME course program is required.

This month's courses appear on pages 671–674.

FREE AUDIO!

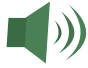

## Have You Heard?

You can listen to highlights of *The American Journal of Psychiatry* by downloading a monthly free .mp3 audio file from our web site (<http://ajp.psychiatryonline.org/audio.aspx#>) or by subscribing to the AJP Audio podcast at iTunes or other feed reader. Presented by Deputy Editor Dr. Susan Schultz or by Executive Editor Michael Roy, each month's audio lasts approximately 30 minutes and covers several research articles, the Treatment in Psychiatry feature, and one or two editorials.

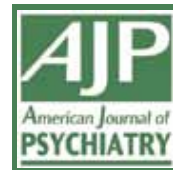

Coming in the July 2012 issue\*

## THE AMERICAN JOURNAL OF PSYCHIATRY

Functional Neuroimaging of Major Depressive Disorder: A Meta-Analysis and New Integration of Baseline Activation and Neural Response Data

J.P. Hamilton, A. Etkin, D.J. Furman, M.G. Lemus, R.F. Johnson, I.H. Gotlib

Risk Adjustment in Health Insurance Exchanges for Individuals With Mental Illness

C.L. Barry, J.P. Weiner, K. Lemke, S.H. Busch

Combined Cognitive Remediation and Functional Skills Training for Schizophrenia: Effects on Cognition, Functional Competence, and Real-World Behavior

C.R. Bowie, S.R. McGurk, B. Mausbach, T.L. Patterson, P.D. Harvey

Examining Transcranial Direct-Current Stimulation (tDCS) as a Treatment for Hallucinations in Schizophrenia

J. Brunelin, M. Mondino, L. Gassab, F. Haesebaert, L. Gaha, M.-F. Suaud-Chagny, M. Saoud, A. Mechri, E. Poulet

\*Can't wait? Visit [ajp.psychiatryonline.org/AJPInAdvance.aspx](http://ajp.psychiatryonline.org/AJPInAdvance.aspx) to see all articles uploaded in advance of print!

# The Residents' JOURNAL

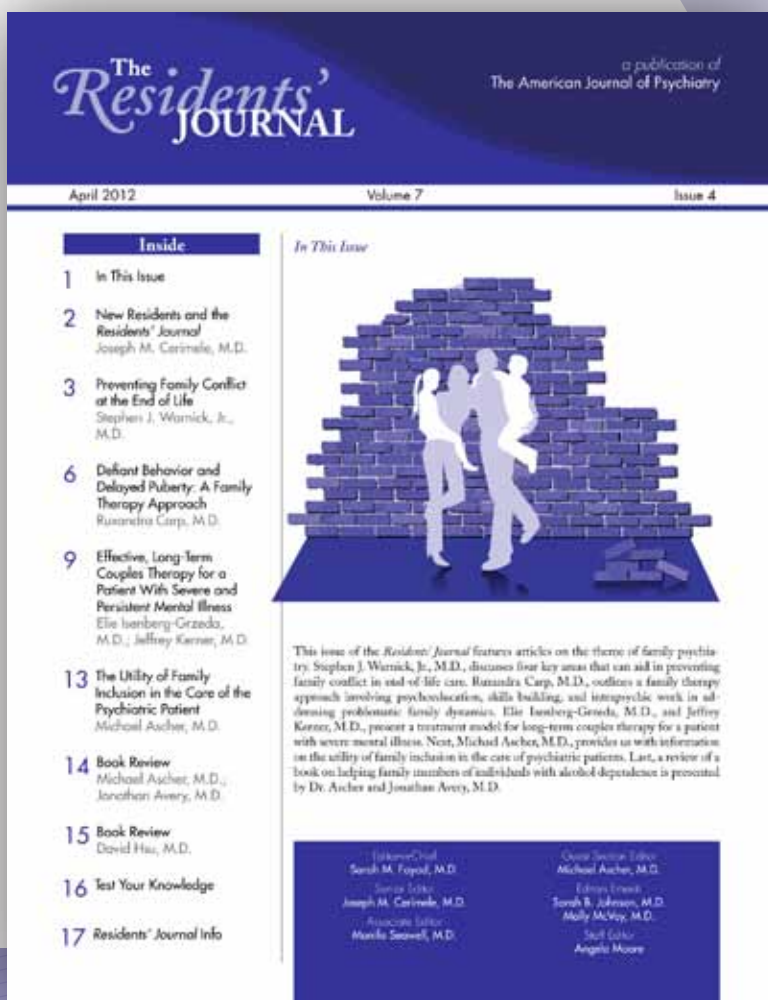

The Residents' Journal accepts manuscripts authored by medical students, resident physicians, and fellows. To submit your paper, please visit the manuscript submission site at [mc.manuscriptcentral.com/appi-ajp](http://mc.manuscriptcentral.com/appi-ajp) and either create an account or use your existing account. For manuscript type, select "Residents." Then follow the instructions to upload your manuscript. Residents who are interested in participating as Guest Section Editors should e-mail the Residents' Journal Editor-in-Chief Sarah M. Fayad at [fayad@ufl.edu](mailto:fayad@ufl.edu).

See the September 2010 issue for details on the new peer review process.

The Residents' Journal is sent free-of-charge to all psychiatry residents. Anyone interested in being included on the distribution list should contact Angela Moore, the Residents' Journal staff editor at [ajp@psych.org](mailto:ajp@psych.org) with "Subscribe to Residents' Journal" in the subject line.

To access the complete Residents' Journal archives, visit [ajp.psychiatryonline.org/residents\\_journal.aspx](http://ajp.psychiatryonline.org/residents_journal.aspx)

## Contents

- A21 Editorial Board  
A23 Highlights of this issue

## Editorials

- 439 **Psychodynamic psychiatry's green shoots**  
J. Holmes

- 441 **Medical Students – poems by doctors**  
Rachel Clark

- 442 **Better care for depression in the workplace: integrating occupational and mental health services**  
S. Gilbody, P. Bower and J. Rick

- 444 **Role of mental health professionals in the management of functional somatic symptoms in primary care**  
R. Morriss

## Review article

- 446 **Methodology and reporting of systematic reviews and meta-analyses of observational studies in psychiatric epidemiology: systematic review**  
T. S. Brugha, R. Matthews, Z. Morgan, T. Hill, J. Alonso and D. R. Jones

- 453 **Psychiatry rocks – psychiatry in music**  
James McDonald

## Papers

- 454 **Role of common mental and physical disorders in partial disability around the world**  
R. Bruffaerts, G. Vilagut, K. Demyttenaere, J. Alonso, A. AlHamzawi, L. H. Andrade, C. Benjet, E. Bromet, B. Bunting, G. de Girolamo, S. Florescu, O. Gureje, J. M. Haro, Y. He, H. Hinkov, C. Hu, E. G. Karam, J.-P. Lepine, D. Levinson, H. Matschinger, Y. Nakane, J. Ormel, J. Posada-Villa, K. M. Scott, M. Varghese, D. R. Williams, M. Xavier and R. C. Kessler
- 462 **Cognitive development in children with 22q11.2 deletion syndrome**  
S. N. Duijff, P. W. J. Klaassen, H. F. N. Swaaborg de Veye, F. A. Beemer, G. Sinnamon and J. A. S. Vorstman
- 469 **Childhood maltreatment and DSM-IV adult mental disorders: comparison of prospective and retrospective findings**  
K. M. Scott, K. A. McLaughlin, D. A. R. Smith and P. M. Ellis

- 475 **Georg Buchner – in 100 words**  
Iain McClure

- 476 **Alcohol use disorders and the course of depressive and anxiety disorders**  
L. Boschloo, N. Vogelzangs, W. van den Brink, J. H. Smit, D. J. Veltman, A. T. F. Beekman and B. W. J. H. Penninx

- 484 **Cancer Winter (excerpts) – poem**  
Marilyn Hacker

- 485 **Temperature-related deaths in people with psychosis, dementia and substance misuse**  
L. A. Page, S. Hajat, R. S. Kovacs and L. M. Howard

- 491 **Visual cortex in dementia with Lewy bodies: magnetic resonance imaging study**  
J.-P. Taylor, M. J. Firbank, J. He, N. Barnett, S. Pearce, A. Livingstone, Q. Vuong, I. G. McKeith and J. T. O'Brien

- 499 **Cognitive-behavioural group treatment for a range of functional somatic syndromes: randomised trial**  
A. Schröder, E. Rehfeld, E. Ørnbøl, M. Sharpe, R. W. Licht and P. Fink

## Short reports

- 508 **Brain structure and joint hypermobility: relevance to the expression of psychiatric symptoms**  
J. A. Eccles, F. D. C. Beacher, M. A. Gray, C. L. Jones, L. Minati, N. A. Harrison and H. D. Critchley
- 510 **Collaborative care for major depressive disorder in an occupational healthcare setting**  
M. C. Vlasveld, C. M. van der Feltz-Cornelis, H. J. Adär, J. R. Anema, R. Hoedeman, W. van Mechelen and A. T. F. Beekman

## Columns

- 512 **Correspondence**  
514 **Corrections**  
515 **Book reviews**  
516 **Contents of *Advances in Psychiatric Treatment***  
517 **Contents of the *American Journal of Psychiatry***  
518 **From the Editor's desk**

## Cover picture

*What do we have?*  
(2011) by Phil McLoughlin (b. 1946)

The self-portrait poses a challenge for the figurative artist. The reflection is so well-known it becomes one of the great unknowns. How to paint not just what is seen, but 'who' one is? I spent close to 40 years listening to other people talk about their lives; first as a psychiatric nurse, then as a researcher and psychotherapist. A few years ago I decided it was time to hear my own story. My paintings attempt to get inside stories from my life; expressing things which are beyond words. My early work tended to focus on echoes of others' experiences within me; now I am overtaken with meditations on what it means to be 'me'. Some are tense, others humorous; all are absurd – like life. This painting means many things to me. I wonder what meaning does it conjure up in the viewer?

[www.mcloughlinart.com](http://www.mcloughlinart.com)

We are always looking for interesting and visually appealing images for the cover of the *Journal* and would welcome suggestions or pictures, which should be sent to Dr Allan Beveridge, British Journal of Psychiatry, 17 Belgrave Square, London SW1X 8PG, UK or [bjp@rpspsych.ac.uk](mailto:bjp@rpspsych.ac.uk)

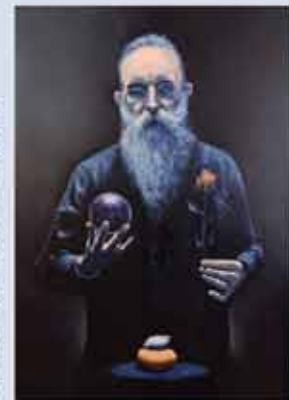

Source: https://ajp.psychiatryonline.org/doi/suppl/10.1176/ajp.2012.169.issue-6/suppl_file/front.pdf
